# Supplementary material
Source: ML conference proceedings conference paper supplement (https://openreview.net/forum?id=MjZVx7a0KX-)

Original results

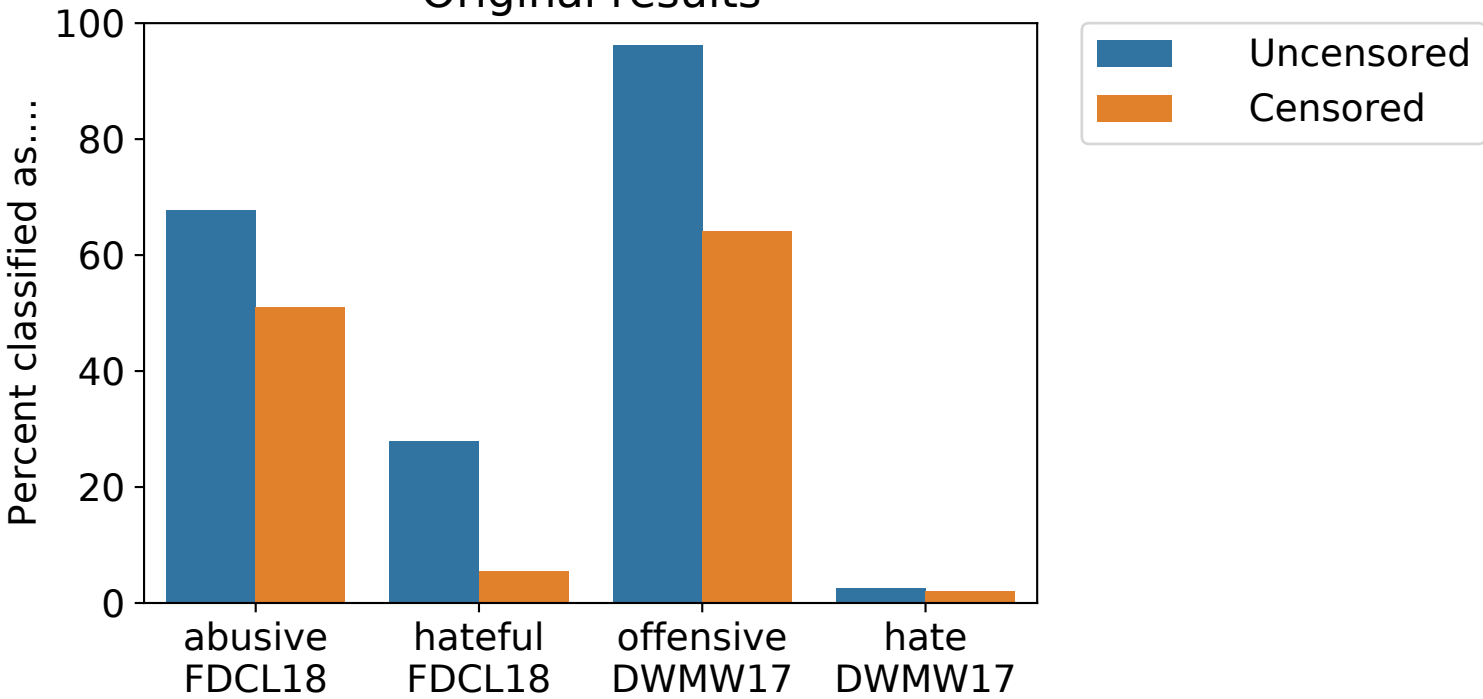

Supplement: supplementary_material [file attachment]

## Our results

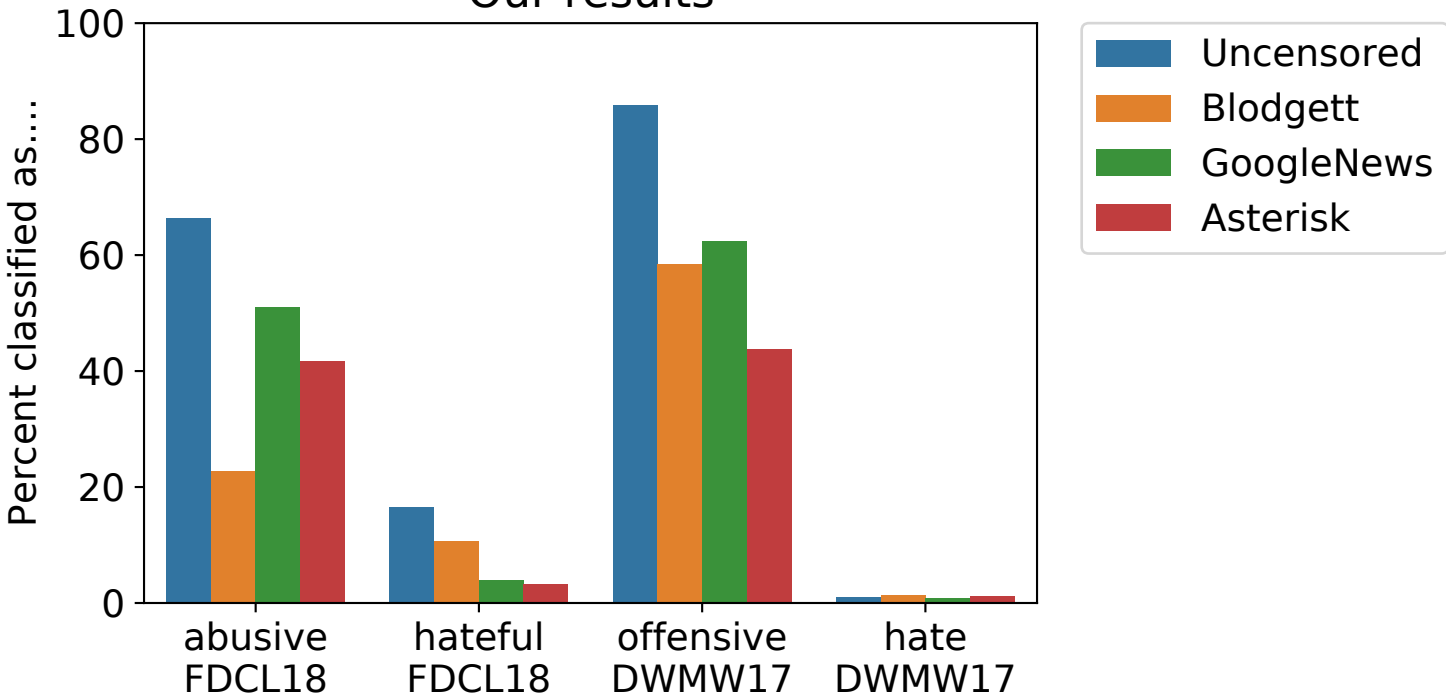

Supplement: supplementary_material [file attachment]
